# Supplementary figures and images for: Water-soluble cellulose acetate attenuates glucose intolerance through GLP-1 and PYY signal upregulation
Source: Research Square preprint supplement (doi:10.21203/rs.3.rs-5984591/v1), 2025-03-13

Supplementary Figure 1

Composition and Structural Formula of WSCA Used in this study


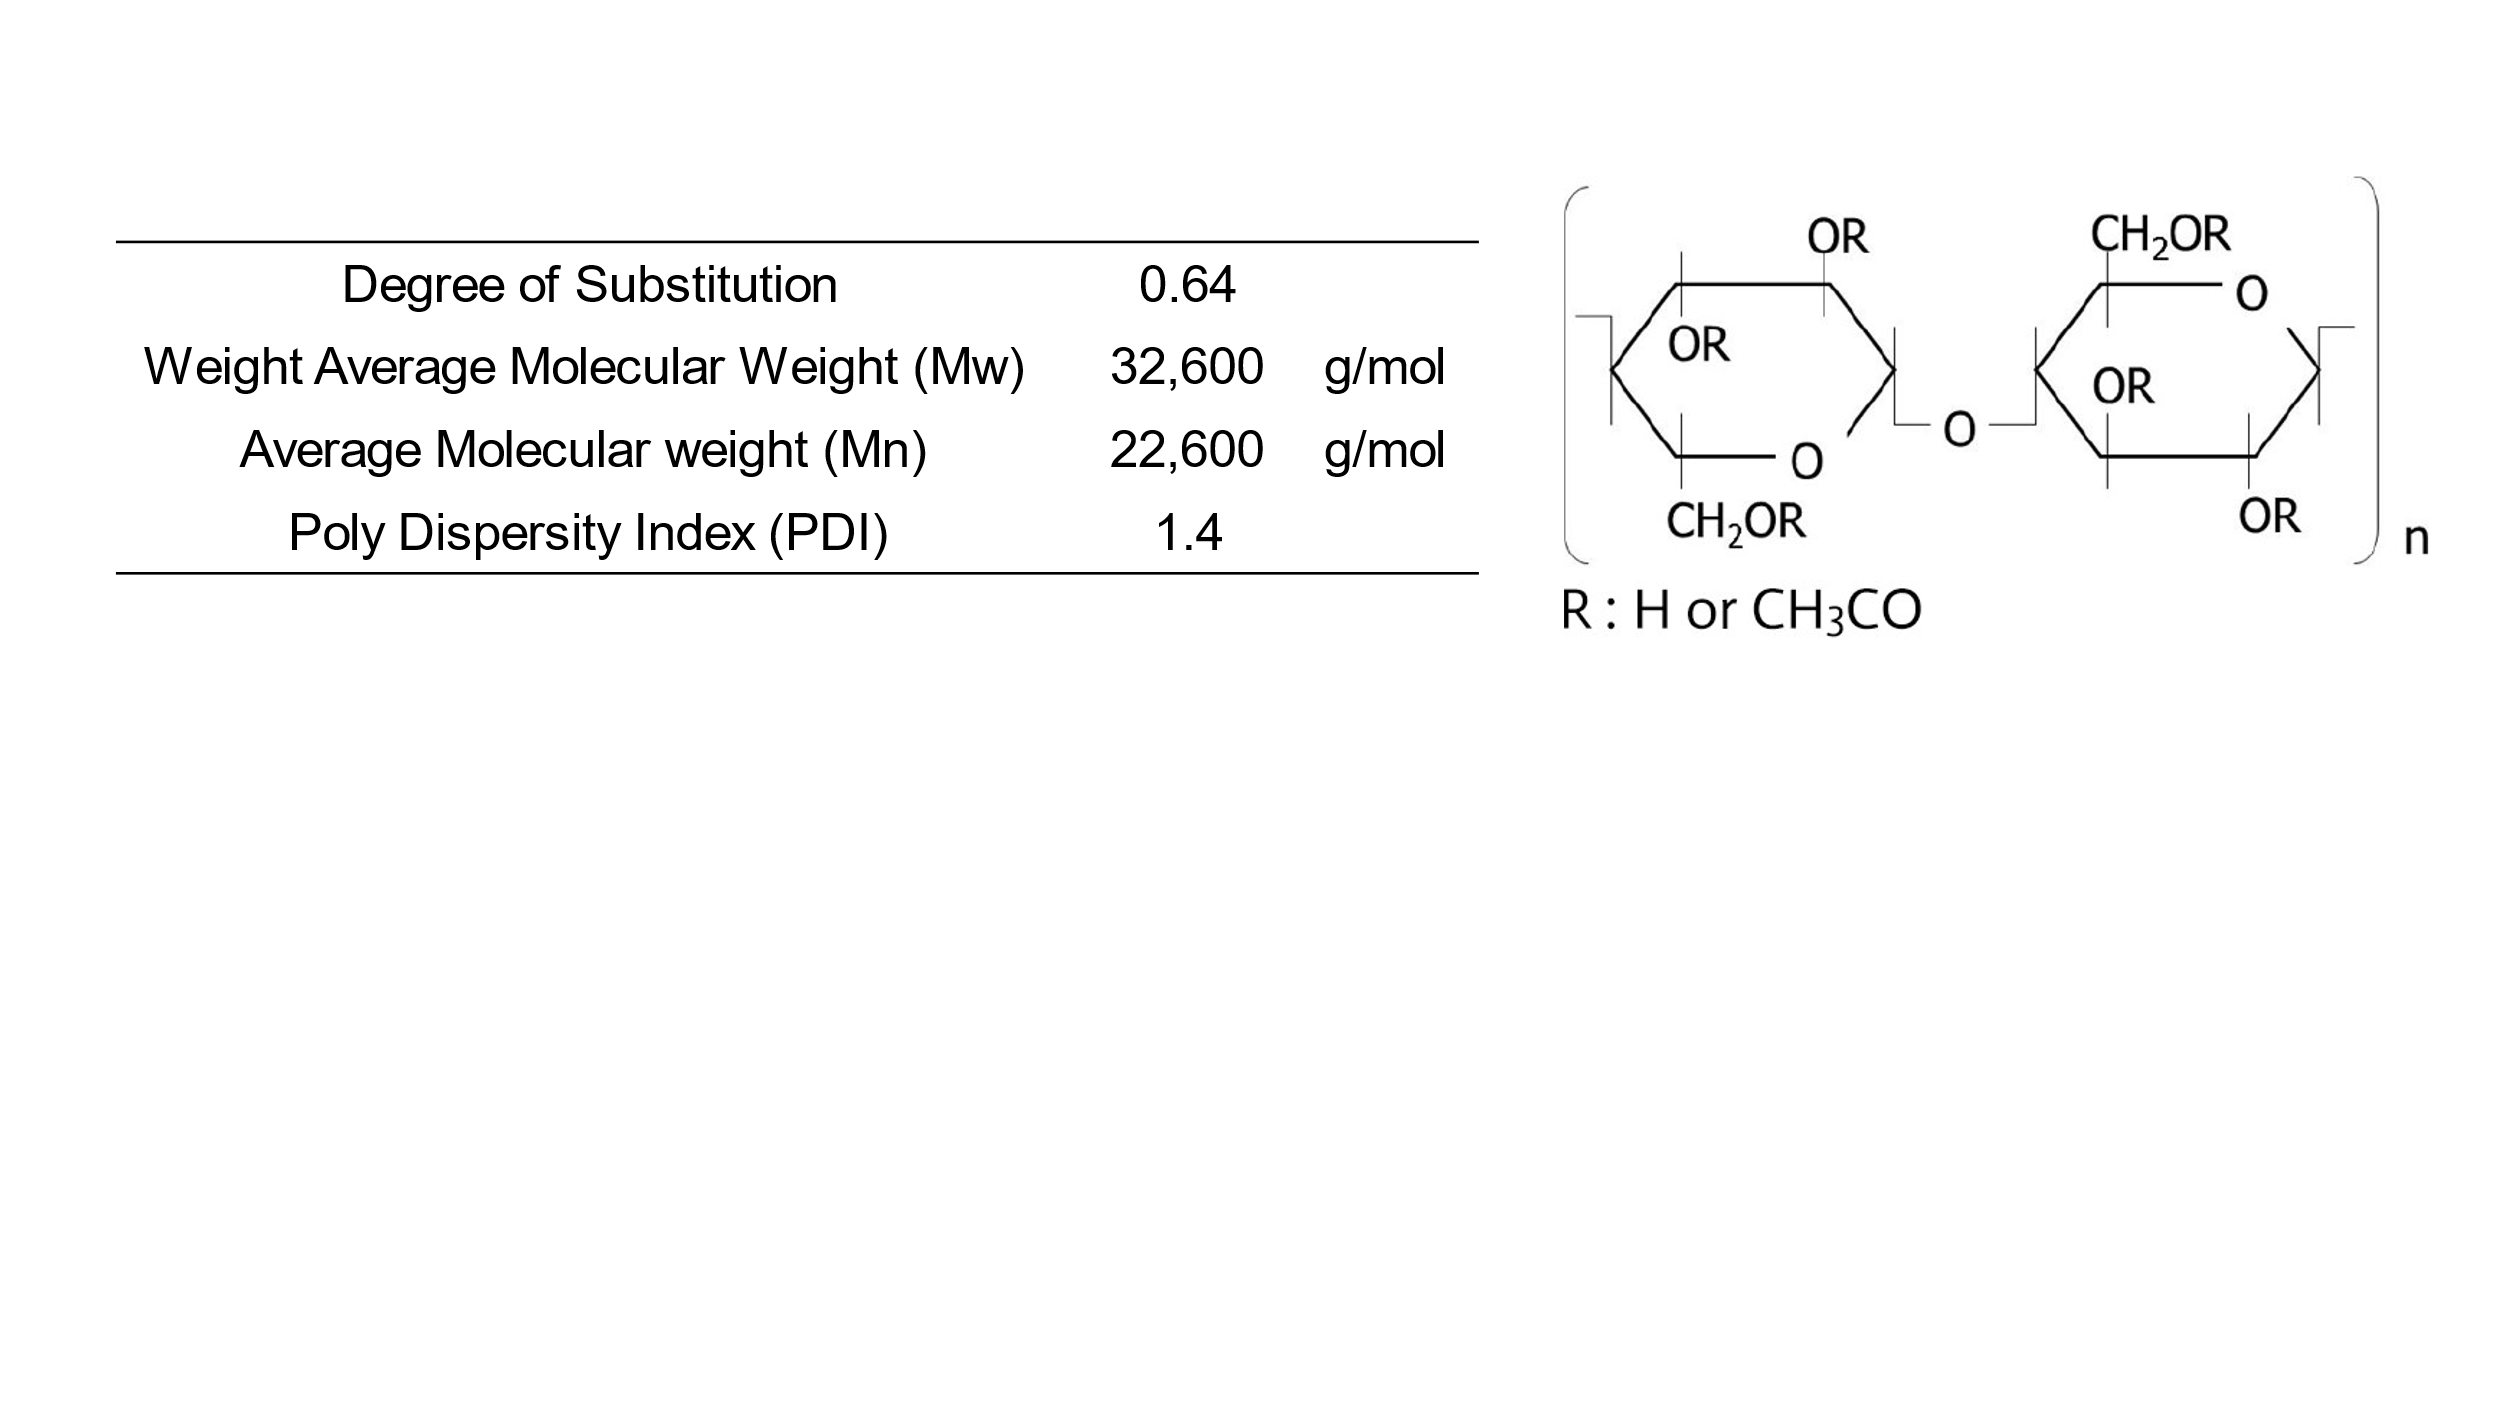

Supplement: Supplementary file 1 [file 51cbb1d495baa03ae65ce683.docx]
